# Supplementary material for: In silico analysis of doxorubicin analogues conjugated to polysorbate 80 for sustained and targeted delivery to the brain
Source: Research Square preprint supplement (doi:10.21203/rs.3.rs-5910276/v1), 2025-02-03
Supplement: Supplementary file 1 [file aba5c0812fc40a56ddef0ba3.docx]

***In silico* analysis of doxorubicin analogues conjugated to polysorbate 80 for sustained and targeted delivery to the brain**

D. K. S. Lekshmi a,c, Arsha S Nair b,c , A. Jayakrishnan c, Sandhya K.S.c*

*a Department of Chemistry, Sree Narayana College for Women, Kollam-691001, Kerala, India*

*b Department of Chemistry, University of Kerala, Kariavattom, Thiruvananthapuram-695581, Kerala, India*

*c Department of Chemistry, SN College Chathannur, Kollam-691579, Kerala, India*

**Supporting Information**

**Table SI1** Binding affinity of twelve DOX ligands with target proteins

| **DOX**  **Ligands** | **Molecular Formula** | **2IG0** | **3LGF** | **3LGL** | **4RG2** | **3PG7** | **3LH0** | | **4HBM** | |
| --- | --- | --- | --- | --- | --- | --- | --- | --- | --- | --- |
|  |  | **Affinity (kcal/mol)** | | | | | | | | |
| R1 | C27H29NO11 | -7.08 | -8.60 | -7.55 | -8.85 | -7.75 | | -7.81 | | -6.14 |
| R2 | C29H30BrNO12 | -6.85 | **-8.94** | -7.47 | -8.42 | **-9.35** | | **-7.84** | | **-6.27** |
| R3 | C29H30ClNO12 | -5.96 | **-8.91** | -7.37 | -8.09 | **-7.87** | | -6.19 | | **-6.37** |
| R4 | C34H32BrNO14S | -6.43 | -8.49 | -5.96 | **-10.06** | **-11.10** | | -6.01 | | **-6.50** |
| R5 | C30H32ClN3O13 | -5.98 | **-9.12** | -7.02 | -7.82 | **-9.06** | | -7.09 | | **-6.33** |
| R6 | C34H32ClNO14S | **-8.16** | **-8.88** | -7.17 | **-10.53** | **-12.02** | | -7.80 | | **-9.50** |
| R7 | C30H32BrN3O13 | -6.89 | **-9.69** | -5.98 | -8.01 | **-9.24** | | -6.32 | | **-8.07** |
| R8 | C29H30FNO12 | -6.13 | **-9.35** | **-7.68** | -7.78 | **-8.59** | | -6.17 | | **-7.40** |
| R9 | C34H32FNO14S | -6.55 | -7.97 | -6.22 | **-9.29** | **-10.19** | | -5.82 | | **-7.47** |
| R10 | C30H32FN3O13 | -6.97 | -8.23 | -6.29 | -7.67 | **-9.07** | | -6.06 | | **-6.72** |
| R11 | C28H31NO12 | -6.15 | -8.12 | -7.10 | -7.96 | **-8.81** | | -6.83 | | **-6.29** |
| R12 | C28H29NO13 | **-7.29** | -7.06 | -5.70 | -8.47 | **-7.85** | | -6.64 | | **-7.59** |

**Notable Binding Affinity Highest Binding Affinity**

**Figure SI1** Best 3D interaction diagram with a surface color by hydrogen bond type of best three DOX ligands with 3PG7: a) R6_3PG7 b) R4_3PG7 c) R9_3PG7

**
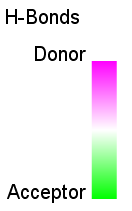

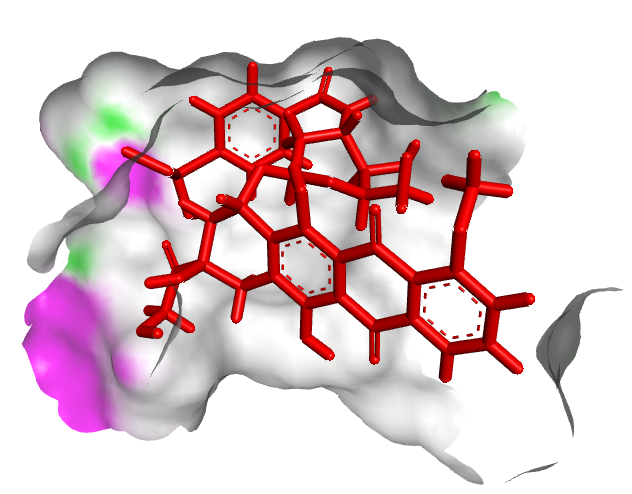
**

**a)**

**
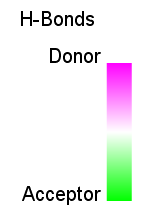

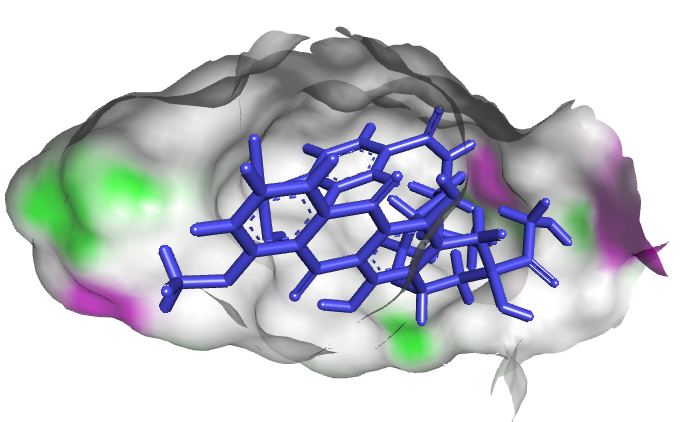
**

**b)**

**
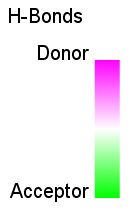

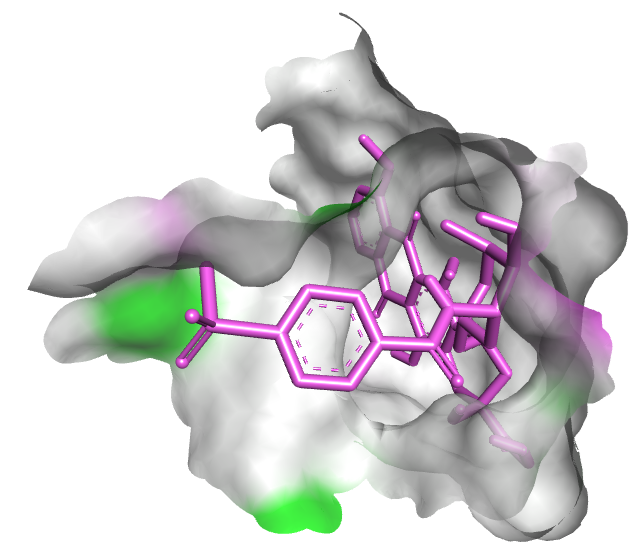
**

**c)**

**Table SI2** ADMET AI Properties of twelve DOX ligands

| **ABSORPTION** | | | | | | | | | | | | | | | | | | | | | | | | | | | | | | |
| --- | --- | --- | --- | --- | --- | --- | --- | --- | --- | --- | --- | --- | --- | --- | --- | --- | --- | --- | --- | --- | --- | --- | --- | --- | --- | --- | --- | --- | --- | --- |
| **Property** | **R1** | | | **R2** | | | **R3** | | | **R4** | | | **R5** | | | **R6** | | | **R7** | | | **R8** | | **R9** | | **R10** | | **R11** | | **R12** |
| **HIA** | 0.94 | | | 0.93 | | | 0.90 | | | 0.87 | | | 0.91 | | | 0.90 | | | 0.93 | | | 0.95 | | 0.84 | | 0.89 | | 0.78 | | 0.54 |
| **Oral Bioavailability** | 0.53 | | | 0.57 | | | 0.58 | | | 0.53 | | | 0.73 | | | 0.62 | | | 0.74 | | | 0.61 | | 0.67 | | 0.70 | | 0.42 | | 0.40 |
| **Aqueous Solubility** | -3.70 | | | -4.36 | | | -4.05 | | | -3.61 | | | -3.81 | | | -4.27 | | | -4.12 | | | -3.71 | | -3.81 | | -3.71 | | -3.50 | | -3.47 |
| **Lipophilicity** | 0.03 | | | 1.28 | | | 1.28 | | | 1.32 | | | 1.42 | | | 1.32 | | | 1.71 | | | 0.81 | | 1.18 | | 1.28 | | -0.13 | | -0.13 |
| **Hydration Free Energy** | -12.61 | | | -12.44 | | | -12.40 | | | -12.50 | | | -12.68 | | | -12.30 | | | -12.15 | | | -12.96 | | -11.97 | | -12.25 | | -13.25 | | -13.50 |
| **Cell Effective Permeability** | -6.40 | | | -6.21 | | | -6.19 | | | -6.22 | | | -5.92 | | | -6.03 | | | -5.89 | | | -6.06 | | -5.78 | | -5.86 | | -6.49 | | -6.31 |
| **PAMPA Permeability** | 0.36 | | | 0.33 | | | 0.29 | | | 0.23 | | | 0.26 | | | 0.30 | | | 0.27 | | | 0.38 | | 0.22 | | 0.26 | | 0.27 | | 0.15 |
| **P-glycoprotein Inhibition** | 0.31 | | | 0.48 | | | 0.46 | | | 0.67 | | | 0.39 | | | 0.67 | | | 0.47 | | | 0.40 | | 0.55 | | 0.38 | | 0.26 | | 0.16 |
| **DISTRIBUTION** | | | | | | | | | | | | | | | | | | | | | | | | | | | | | | |
| **Property** | | | **R1** | | | **R2** | | **R3** | | | **R4** | | | **R5** | | **R6** | | **R7** | | **R8** | | | **R9** | | **R10** | | **R11** | | **R12** | |
| **BBB Penetration** | | | 0.06 | | | 0.14 | | 0.11 | | | 0.06 | | | 0.15 | | 0.06 | | 0.18 | | 0.22 | | | 0.12 | | 0.17 | | 0.07 | | 0.11 | |
| **Plasma PB Rate** | | | 73.88 | | | 93.53 | | 88.93 | | | 99.32 | | | 88.84 | | 97.75 | | 92.57 | | 84.53 | | | 90.71 | | 85.88 | | 75.61 | | 77.99 | |
| **Volume Of Distribution** | | | 22.85 | | | 25.42 | | 26.36 | | | 24.27 | | | 18.15 | | 21.41 | | 18.06 | | 24.97 | | | 19.82 | | 17.99 | | 24.81 | | 21.16 | |
| **METABOLISM** | | | | | | | | | | | | | | | | | | | | | | | | | | | | | | |
| **Property** | | **R1** | | | **R2** | | **R3** | | **R4** | | | **R5** | | | **R6** | | **R7** | | | | **R8** | | | **R9** | | **R10** | | **R11** | | **R12** |
| **CYP1A2 Inhibition** | | 0.05 | | | 0.07 | | 0.07 | | 0.05 | | | 0.03 | | | 0.04 | | 0.04 | | | | 0.04 | | | 0.06 | | 0.03 | | 0.04 | | 0.03 |
| **CYP2C19 Inhibition** | | 0.03 | | | 0.10 | | 0.10 | | 0.11 | | | 0.06 | | | 0.10 | | 0.10 | | | | 0.04 | | | 0.04 | | 0.05 | | 0.05 | | 0.02 |
| **CYP2C9 Substrate** | | 0.01 | | | 0.02 | | 0.01 | | 0.02 | | | 0.03 | | | 0.03 | | 0.04 | | | | 0.02 | | | 0.03 | | 0.03 | | 0.01 | | 0.03 |
| **CYP2C9 Inhibition** | | 0.03 | | | 0.08 | | 0.07 | | 0.16 | | | 0.09 | | | 0.12 | | 0.13 | | | | 0.06 | | | 0.09 | | 0.08 | | 0.04 | | 0.04 |
| **CYP2D6 Substrate** | | 0.01 | | | 0.01 | | 0.01 | | 0.01 | | | 0.02 | | | 0.01 | | 0.02 | | | | 0.02 | | | 0.03 | | 0.02 | | 0.02 | | 0.01 |
| **CYP2D6 Inhibition** | | 0.03 | | | 0.06 | | 0.07 | | 0.07 | | | 0.08 | | | 0.05 | | 0.09 | | | | 0.04 | | | 0.04 | | 0.08 | | 0.05 | | 0.04 |
| **CYP3A4 Substrate** | | 0.44 | | | 0.45 | | 0.44 | | 0.51 | | | 0.32 | | | 0.49 | | 0.36 | | | | 0.46 | | | 0.39 | | 0.36 | | 0.43 | | 0.30 |
| **CYP3A4 Inhibition** | | 0.11 | | | 0.21 | | 0.25 | | 0.07 | | | 0.33 | | | 0.10 | | 0.33 | | | | 0.10 | | | 0.08 | | 0.27 | | 0.08 | | 0.03 |

| **EXCRETION** | | | | | | | | | | | | |
| --- | --- | --- | --- | --- | --- | --- | --- | --- | --- | --- | --- | --- |
| **Property** | **R1** | **R2** | **R3** | **R4** | **R5** | **R6** | **R7** | **R8** | **R9** | **R10** | **R11** | **R12** |
| **Half Life** | 38.25 | 95.41 | 84.50 | 142.00 | 78.26 | 125.54 | 82.30 | 64.89 | 129.60 | 72.83 | 64.84 | 55.67 |
| **Drug Clearance(Hepatocyte)** | 31.80 | 12.90 | 5.74 | 5.54 | -8.53 | 11.20 | -6.54 | 6.99 | 3.89 | -11.62 | 26.16 | 3.64 |
| **Drug Clearance(Microsome)** | 42.29 | 53.28 | 45.59 | 50.05 | 37.51 | 41.21 | 45.32 | 38.46 | 31.51 | 39.54 | 46.09 | 38.35 |

| **TOXICITY** |
| --- |

| **Property** | **R1** | **R2** | **R3** | **R4** | **R5** | **R6** | **R7** | **R8** | **R9** | **R10** | **R11** | **R12** |
| --- | --- | --- | --- | --- | --- | --- | --- | --- | --- | --- | --- | --- |
| **Carcinogenity** | 0.02 | 0.06 | 0.06 | 0.08 | 0.15 | 0.09 | 0.16 | 0.07 | 0.17 | 0.15 | 0.03 | 0.03 |

**Table SI3** ADMET AI Properties of PS80

| **ABSORPTION** | | | | | | | |
| --- | --- | --- | --- | --- | --- | --- | --- |
| **HIA** | **Oral**  **Bioavailability** | **Aqueous**  **Solubility** | **Lipophilicity** | **Hydration**  **Free Energy** | **Cell Effective Permeability** | **PAMPA Permeability** | **P-glycoprotein**  **Inhibition** |
| 0.97 | 0.50 | -4.12 | 2.51 | -8.06 | -5.52 | 0.77 | 0.91 |

| **DISTRIBUTION** | | |
| --- | --- | --- |
| **Blood Brain Barrier Penetration** | **Plasma Protein Binding Rate** | **Volume of Distribution** |
| 0.45 | 91.08 | 1.25 |

| **METABOLISM** | | | | | | | |
| --- | --- | --- | --- | --- | --- | --- | --- |
| **CYP1A2 Inhibition** | **CYP2C19 Inhibition** | **CYP2C9 Substrate** | **CYP2C9 Inhibition** | **CYP2D6 Substrate** | **CYP2D6 Inhibition** | **CYP3A4 Substrate** | **CYP3A4 Inhibition** |
| 2.96e-03 | 0.08 | 0.01 | 0.17 | 0.03 | 0.01 | 0.77 | 0.43 |

| **EXCRETION** | | |
| --- | --- | --- |
| **Half Life** | **Drug Clearance (Hepatocyte)** | **Drug Clearance (Microsome)** |
| 61.42 | 87.81 | 98.01 |

| **TOXICITY** | |
| --- | --- |
| **Carcinogenity** | 0.04 |

**Table 4** ADMET AI Properties of twelve DOX-PS80 conjugated ligands

| **ABSORPTION** | | | | | | | | | | | | | | | | | | | | | |
| --- | --- | --- | --- | --- | --- | --- | --- | --- | --- | --- | --- | --- | --- | --- | --- | --- | --- | --- | --- | --- | --- |
| **Property** | | **R1**  **PS80** | | | **R2**  **PS80** | | | **R3**  **PS80** | | **R4**  **PS80** | **R5**  **PS80** | | **R6**  **PS80** | | **R7**  **PS80** | | **R8**  **PS80** | **R9**  **PS80** | **R10**  **PS80** | **R11**  **PS80** | **R12**  **PS80** |
| **HIA** | | 1.00 | | | 1.00 | | | 1.00 | | 1.00 | 1.00 | | 1.00 | | 1.00 | | 1.00 | 1.00 | 1.00 | 1.00 | 1.00 |
| **Oral Bioavailability** | | 0.78 | | | 0.80 | | | 0.82 | | 0.82 | 0.88 | | 0.82 | | 0.87 | | 0.79 | 0.83 | 0.85 | 0.75 | 0.72 |
| **Aqueous Solubility** | | -5.42 | | | -5.94 | | | -5.82 | | -5.37 | -6.45 | | -5.34 | | -6.53 | | -5.87 | -5.52 | -6.41 | -4.99 | -5.31 |
| **Lipophilicity** | | 2.69 | | | 3.34 | | | 3.42 | | 3.09 | 3.52 | | 2.86 | | 3.60 | | 3.07 | 3.19 | 3.52 | 2.70 | 2.43 |
| **Hydration Free Energy** | | -10.62 | | | -9.86 | | | -9.60 | | -10.60 | -8.67 | | -10.50 | | -8.66 | | -9.70 | -9.82 | -8.33 | -10.29 | -10.20 |
| **Cell Effective Permeability** | | -5.56 | | | -5.60 | | | -5.59 | | -5.44 | -5.37 | | -5.42 | | -5.37 | | -5.44 | -5.32 | -5.28 | -5.39 | -5.63 |
| **PAMPA Permeability** | | 0.61 | | | 0.53 | | | 0.49 | | 0.48 | 0.43 | | 0.48 | | 0.41 | | 0.61 | 0.50 | 0.46 | 0.64 | 0.51 |
| **P-glycoprotein Inhibition** | | 0.93 | | | 0.94 | | | 0.94 | | 0.96 | 0.93 | | 0.96 | | 0.93 | | 0.95 | 0.96 | 0.93 | 0.95 | 0.91 |
| **DISTRIBUTION** | | | | | | | | | | | | | | | | | | | | | |
| **Property** | **R1**  **PS80** | | | **R2**  **PS80** | | | **R3**  **PS80** | | **R4**  **PS80** | | **R5**  **PS80** | | **R6**  **PS80** | | **R7**  **PS80** | | **R8**  **PS80** | **R9**  **PS80** | **R10**  **PS80** | **R11**  **PS80** | **R12**  **PS80** |
| **BBB Penetration** | 0.45 | | | 0.76 | | | 0.70 | | 0.62 | | 0.70 | | 0.61 | | 0.69 | | 0.75 | 0.57 | 0.69 | 0.48 | 0.64 |
| **Plasma PB Rate** | 103.56 | | | 116.90 | | | 115.21 | | 117.29 | | 114.67 | | 116.41 | | 115.80 | | 116.08 | 116.29 | 115.16 | 104.33 | 110.92 |
| **Volume Of Distribution** | 15.59 | | | 16.32 | | | 15.91 | | 15.49 | | 8.90 | | 15.31 | | 8.40 | | 15.87 | 16.74 | 9.17 | 14.44 | 16.61 |
| **METABOLISM** | | | | | | | | | | | | | | | | | | | | | |
| **Property** | | | **R1**  **PS80** | | | **R2**  **PS80** | | **R3**  **PS80** | | **R4**  **PS80** | **R5**  **PS80** | **R6**  **PS80** | | **R7**  **PS80** | | **R8**  **PS80** | | **R9**  **PS80** | **R10**  **PS80** | **R11**  **PS80** | **R12**  **PS80** |
| **CYP1A2 Inhibition** | | | 0.06 | | | 0.07 | | 0.07 | | 0.10 | 0.05 | 0.09 | | 0.06 | | 0.06 | | 0.07 | 0.05 | 0.03 | 0.04 |
| **CYP2C19 Inhibition** | | | 0.30 | | | 0.26 | | 0.26 | | 0.32 | 0.24 | 0.30 | | 0.26 | | 0.23 | | 0.27 | 0.23 | 0.19 | 0.16 |
| **CYP2C9 Substrate** | | | 0.04 | | | 0.03 | | 0.03 | | 0.06 | 0.05 | 0.06 | | 0.06 | | 0.03 | | 0.06 | 0.05 | 0.03 | 0.04 |
| **CYP2C9 Inhibition** | | | 0.60 | | | 0.52 | | 0.51 | | 0.65 | 0.53 | 0.63 | | 0.56 | | 0.51 | | 0.59 | 0.51 | 0.54 | 0.47 |
| **CYP2D6 Substrate** | | | 0.05 | | | 0.04 | | 0.04 | | 0.04 | 0.07 | 0.05 | | 0.07 | | 0.04 | | 0.05 | 0.07 | 0.03 | 0.03 |
| **CYP2D6 Inhibition** | | | 0.02 | | | 0.02 | | 0.02 | | 0.02 | 0.01 | 0.02 | | 0.01 | | 0.02 | | 0.02 | 0.01 | 0.01 | 0.01 |
| **CYP3A4 Substrate** | | | 0.81 | | | 0.78 | | 0.78 | | 0.79 | 0.77 | 0.78 | | 0.77 | | 0.80 | | 0.79 | 0.79 | 0.83 | 0.74 |
| **CYP3A4 Inhibition** | | | 0.41 | | | 0.46 | | 0.52 | | 0.38 | 0.69 | 0.38 | | 0.67 | | 0.42 | | 0.43 | 0.66 | 0.35 | 0.34 |

| **EXCRETION** | | | | | | | | | | | | |
| --- | --- | --- | --- | --- | --- | --- | --- | --- | --- | --- | --- | --- |
| **Property** | **R1**  **PS80** | **R2**  **PS80** | **R3**  **PS80** | **R4**  **PS80** | **R5**  **PS80** | **R6**  **PS80** | **R7**  **PS80** | **R8**  **PS80** | **R9**  **PS80** | **R10**  **PS80** | **R11**  **PS80** | **R12**  **PS80** |
| **Half Life** | 30.16 | 49.29 | 41.21 | 77.61 | 40.40 | 71.63 | 45.09 | 33.95 | 70.42 | 30.97 | 28.08 | 25.68 |
| **Drug Clearance(Hepatocyte)** | 81.89 | 79.88 | 74.28 | 85.09 | 83.59 | 84.21 | 83.52 | 85.49 | 78.87 | 85.20 | 86.43 | 82.05 |
| **Drug Clearance (Microsome)** | 126.91 | 116.96 | 114.80 | 106.25 | 121.03 | 102.58 | 122.43 | 110.60 | 106.83 | 124.92 | 127.70 | 116.36 |

| **TOXICITY** |
| --- |

| **Property** | **R1**  **PS80** | **R2**  **PS80** | **R3**  **PS80** | **R4**  **PS80** | **R5**  **PS80** | **R6**  **PS80** | **R7**  **PS80** | **R8**  **PS80** | **R9**  **PS80** | **R10**  **PS80** | **R11**  **PS80** | **R12**  **PS80** |
| --- | --- | --- | --- | --- | --- | --- | --- | --- | --- | --- | --- | --- |
| **Carcinogenity** | 0.09 | 0.12 | 0.14 | 0.17 | 0.31 | 0.17 | 0.29 | 0.16 | 0.26 | 0.31 | 0.06 | 0.06 |

**Figure SI2** Radial plots of twelve DOX ligands and PS80


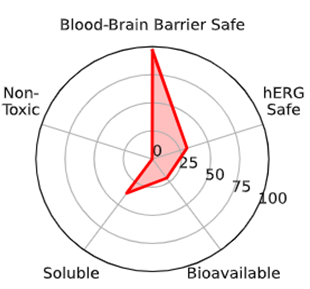

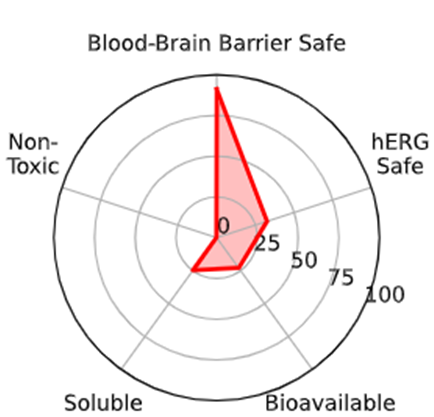

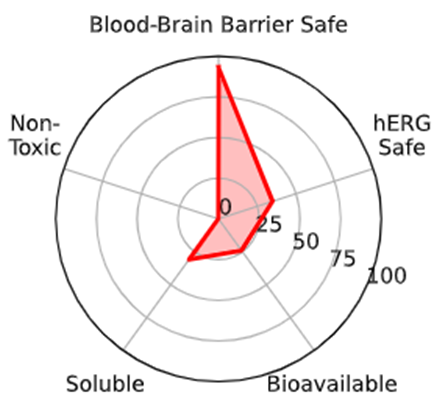


**R1 R2 R3**


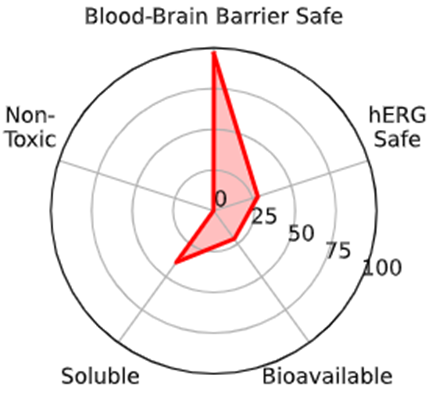

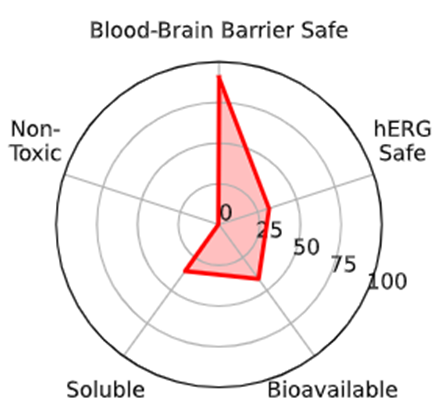

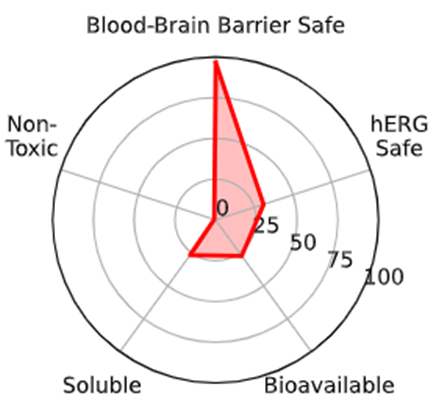


**R4  R5 R6**


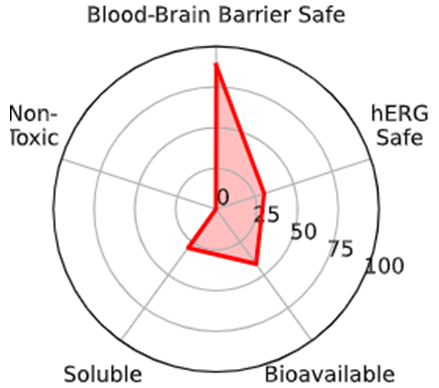

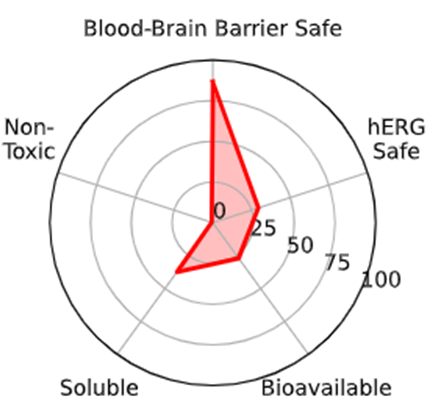

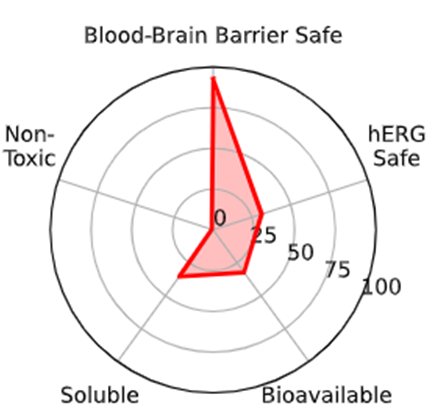


**R7  R8R9**


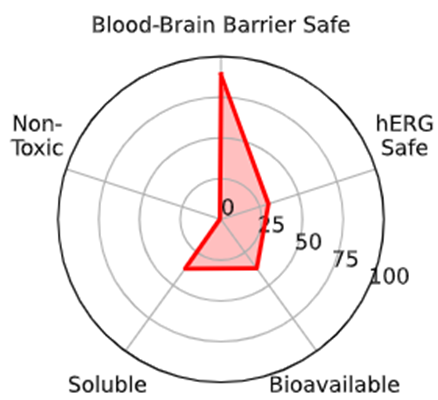

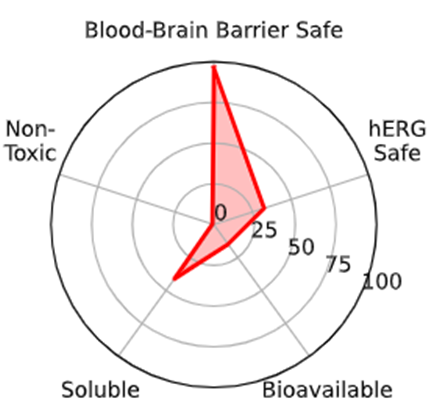

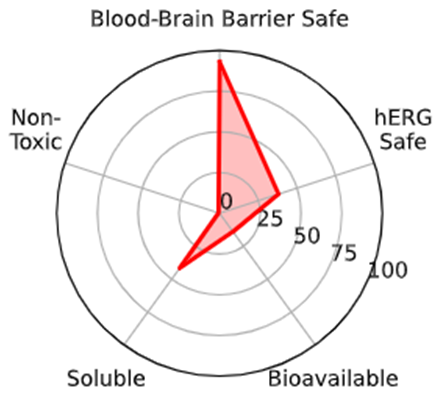


**R10  R11R12**


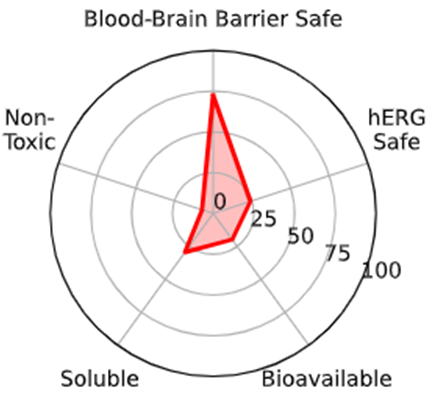


**PS80**

**Figure SI3** Radial plots of twelve DOX-PS80 conjugated ligands


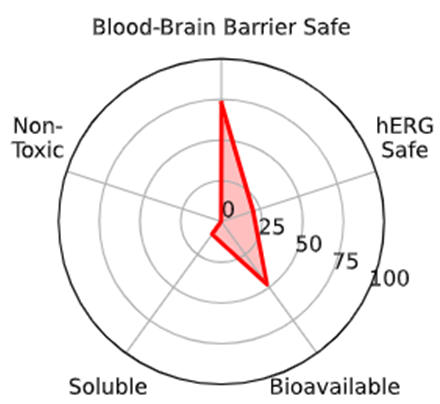

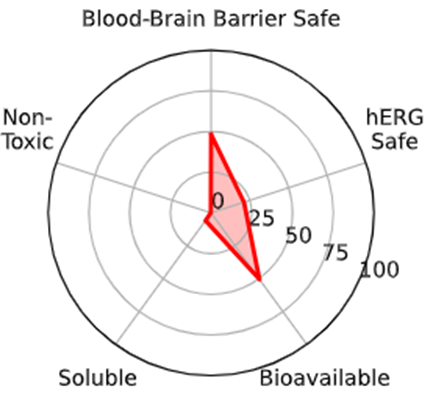

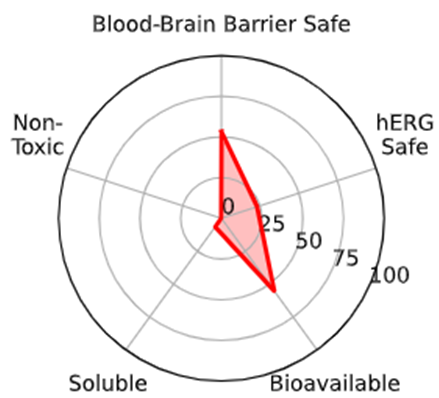


**R1- PS80 R2-PS80 R3- PS80**


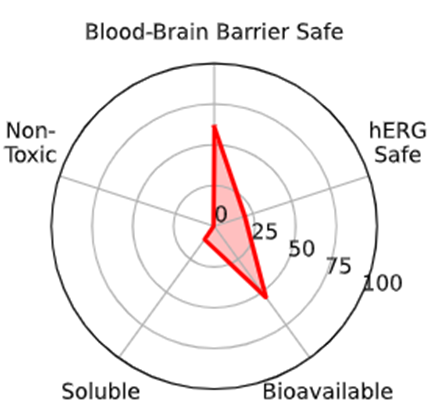

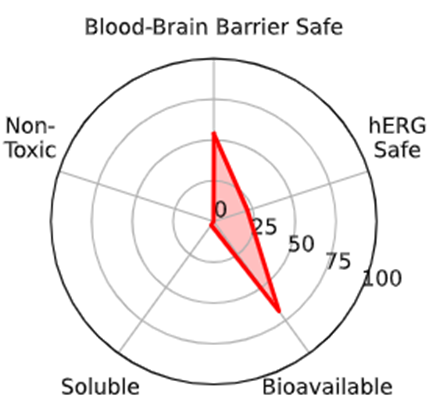

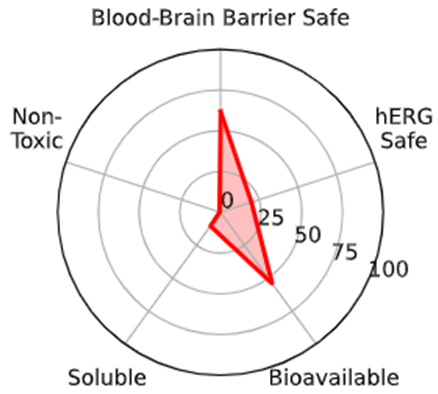


**R4- PS80 R5- PS80 R6- PS80**

**
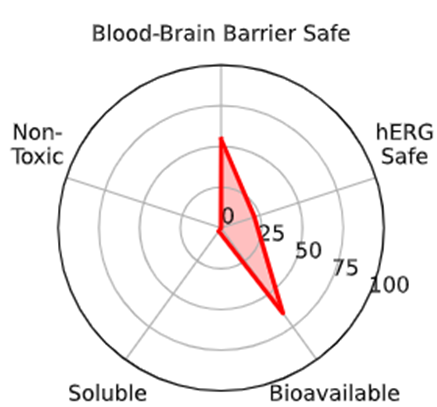

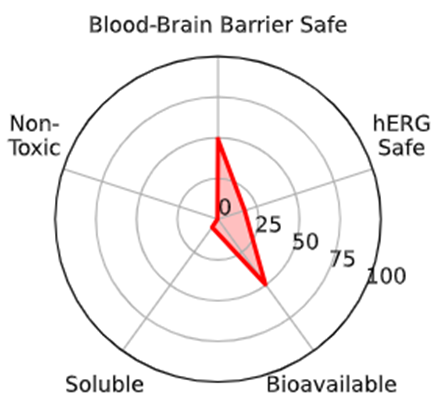

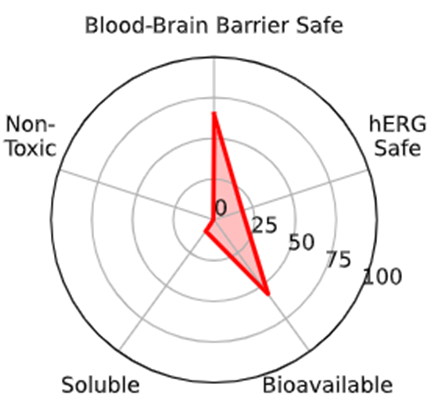
**

**R7- PS80 R8- PS80 R9- PS80**

**
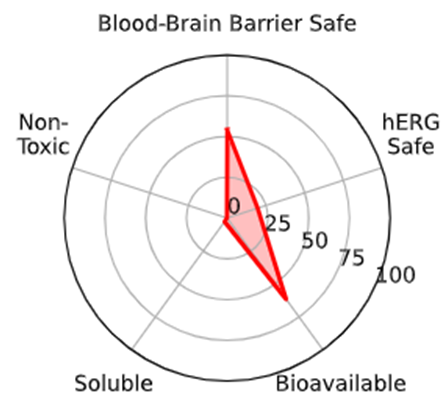

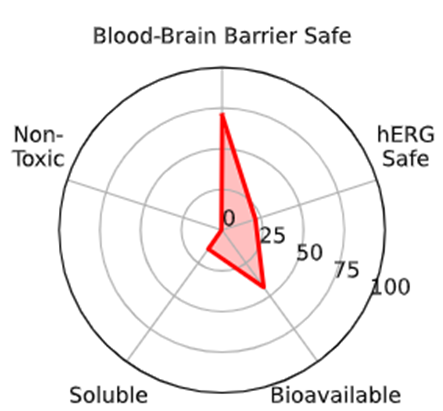

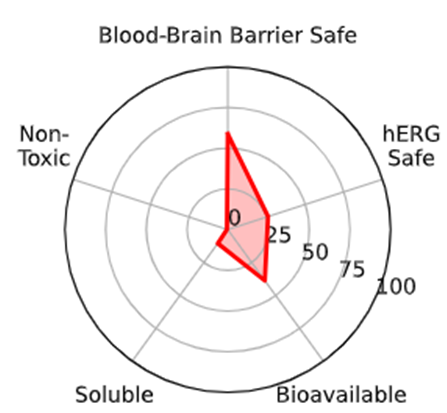
**

**R10 - PS80 R11 - PS80 R12- PS80**
